# Supplementary material for: Pavlovian-conditioned alcohol-seeking behavior in rats is invigorated by the interaction between discrete and contextual alcohol cues: implications for relapse
Source: PubMed Central journal article supplement (PMC3967542; doi:10.1002/brb3.216), 2014-02-06
Supplement: brb30004-0278-sd1.pdf [file brb30004-0278-sd1.pdf]

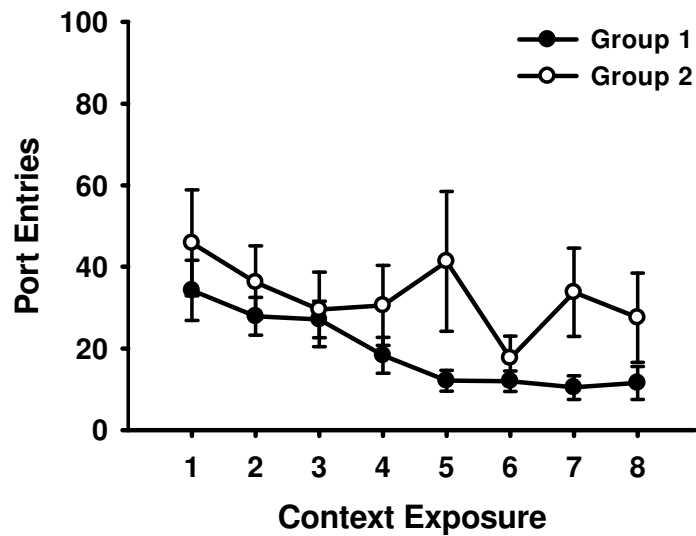

Supplementary Figure 1. Mean ( $\pm$  SEM) total port-entries across sessions in which neither cues nor alcohol were presented. For rats in Group 1 these sessions were conducted in the PDT context (filled symbols) and for rats in Group 2 these sessions were conducted in a distinct, non-alcohol context (open symbols). ANOVA revealed no main effect of Group [ $F(1,7)=3.02$ ,  $P=0.10$ ] and no Group  $\times$  Session interaction [ $F(1,7)=1.15$ ,  $P=0.34$ ]. There was however, a main effect of Session [ $F(1,7)=3.93$ ,  $P=0.01$ ]. Total port-entries collapsed across group decreased from an average (Mean  $\pm$  SEM) of  $39.06 \pm 7.71$  on session 1 to  $18.88 \pm 6.28$  (Mean  $\pm$  SEM) on session 8.
